# Supplementary material
Source: publisher figshare collection journal article supplement (https://springernature.figshare.com/ndownloader/files/7184861)
Supplement: Supplementary file [file 7184861]

| Variable    | Description                                           | Options                                                   |
|-------------|-------------------------------------------------------|-----------------------------------------------------------|
| Age         | Age of diagnosis or age at which survey was completed |                                                           |
| Edu         | Education                                             | 1. Less than 8 years                                      |
| Edu         | Education                                             | 2. 8 - 11 years (without graduation)                      |
| Edu         | Education                                             | 3. High school graduation                                 |
| Edu         | Education                                             | 4. Vocational or technical school                         |
| Edu         | Education                                             | 5. Some college or university                             |
| Edu         | Education                                             | 6. Bachelor's degree                                      |
| Edu         | Education                                             | 7. Graduate degree                                        |
| Marital     | Marriage Status                                       | 1. Never married                                          |
| Marital     | Marriage Status                                       | 2. Married or living as married                           |
| Marital     | Marriage Status                                       | 3. Separated                                              |
| Marital     | Marriage Status                                       | 4. Divorced                                               |
| Marital     | Marriage Status                                       | 5. Widowed                                                |
| Marital     | Marriage Status                                       | 9. Unknown                                                |
| RelPref     | Religious Preference                                  | 01. None                                                  |
| RelPref     | Religious Preference                                  | 05. Roman Catholic                                        |
| RelPref     | Religious Preference                                  | 06. Christian or Protestant, NOS                          |
| RelPref     | Religious Preference                                  | 34. Orthodox, Christian, NOS or Other (Lebanese Maronite) |
| RelPref     | Religious Preference                                  | 37. Latter Day Saints (Mormon)                            |
| RelPref     | Religious Preference                                  | 70. Jewish                                                |
| Health      | In General, your health is:                           | 1. Excellent                                              |
| Health      | In General, your health is:                           | 2. Very good                                              |
| Health      | In General, your health is:                           | 3. Good                                                   |
| Health      | In General, your health is:                           | 4. Fair                                                   |
| Health      | In General, your health is:                           | 5. Poor                                                   |
| Physical    | Last Complete Physical Exam                           | 1. Never                                                  |
| Physical    | Last Complete Physical Exam                           | 2. Within the past year (0 to 12 months ago)              |
| Physical    | Last Complete Physical Exam                           | 3. One to two years ago (13 to 24 months ago)             |
| Physical    | Last Complete Physical Exam                           | 4. Two to five years ago (25 to 60 months ago)            |
| Physical    | Last Complete Physical Exam                           | 5. More than five years ago (61 months or more)           |
| MenstrAge   | Age at menarche                                       |                                                           |
| Contr       | Ever used hormonal Contraceptives?                    | 1. Yes                                                    |
| Contr       | Ever used hormonal Contraceptives?                    | 2. No                                                     |
| Contr       | Ever used hormonal Contraceptives?                    | 9. Unknown                                                |
| ContrAge1st | Age at first contraceptive use                        |                                                           |
| Pregnant    | Ever been Pregnant?                                   | 1. Yes                                                    |
| Pregnant    | Ever been Pregnant?                                   | 2. No                                                     |

|                |                                          |                                 |
|----------------|------------------------------------------|---------------------------------|
| Pregnant       | Ever been Pregnant?                      | 9. Unknown                      |
| PregnantNo     | Number of pregnancies                    |                                 |
| TtlLiveBirth   | Total live births                        |                                 |
| FirstBirthAge  | Age at first birth                       |                                 |
| LastBirthAge   | Age at last birth                        |                                 |
| BrFeed         | Ever Breast Feed for one month or more?  | 1. Yes                          |
| BrFeed         | Ever Breast Feed for one month or more?  | 2. No                           |
| BrFeed         | Ever Breast Feed for one month or more?  | 9. Unknown                      |
| UnableChild    | Unable to have children                  | 1. Yes                          |
| UnableChild    | Unable to have children                  | 2. No                           |
| UnableChild    | Unable to have children                  | 9. Unknown                      |
| Period         | Last Period                              | 1. Less than 1 month            |
| Period         | Last Period                              | 2. 1 to 6 months                |
| Period         | Last Period                              | 3. 7 months to less than 1 year |
| Period         | Last Period                              | 4. 1 year or more               |
| Period         | Last Period                              | 5. Never had a menstrual period |
| Period         | Last Period                              | 9. Unknown                      |
| PeriodStop     | Period Stop                              | 1. Yes                          |
| PeriodStop     | Period Stop                              | 2. No                           |
| PeriodStop     | Period Stop                              | 9. Unknown                      |
| PeriodAge      | Age when period stopped                  |                                 |
| Tamoxifen      | Tamoxifen                                | 1. Yes                          |
| Tamoxifen      | Tamoxifen                                | 2. No                           |
| Tamoxifen      | Tamoxifen                                | 9. Unknown                      |
| Alcohol        | Consumed alcohol for 6 months or longer? | 1. Yes                          |
| Alcohol        | Consumed alcohol for 6 months or longer? | 2. No                           |
| Alcohol        | Consumed alcohol for 6 months or longer? | 9. Unknown                      |
| CigSmoke       | Smoked at least one cigarette a day      | 1. Yes                          |
| CigSmoke       | Smoked at least one cigarette a day      | 2. No                           |
| CigSmoke       | Smoked at least one cigarette a day      | 9. Unknown                      |
| Employment     | Do you currently have a job?             | 1. Employed full time           |
| Employment     | Do you currently have a job?             | 2. Employed part time           |
| Employment     | Do you currently have a job?             | 3. Currently not employed       |
| Polyps         | Polyps                                   | 1. Yes                          |
| Polyps         | Polyps                                   | 2. No                           |
| Polyps         | Polyps                                   | 9. Unknown.                     |
| ImmunoDisorder | Immunologic Disorder                     | 1. Yes                          |
| ImmunoDisorder | Immunologic Disorder                     | 2. No                           |
| ImmunoDisorder | Immunologic Disorder                     | 9. Unknown                      |
| Hypertension   | Hypertension                             | 1. Yes                          |
| Hypertension   | Hypertension                             | 2. No                           |
| Hypertension   | Hypertension                             | 9. Unknown                      |

|             |                   |            |
|-------------|-------------------|------------|
| AntiInfDrug | Anti inflammatory | 1. Yes     |
| AntiInfDrug | Anti inflammatory | 2. No      |
| AntiInfDrug | Anti inflammatory | 9. Unknown |
